# Supplementary material
Source: PubMed Central journal article supplement (PMC3669118)
Supplement: epi-8-252-s01.pdf [file epi-8-252-s01.pdf]

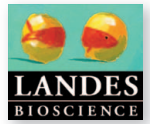

## **Supplemental Material to:**

**Amy A. Slater, Majed Alokail, Dean Gentle, Masahiro Yao,  
Gyula Kovacs, Eamonn R. Maher and Farida Latif**

**DNA methylation profiling distinguishes histological  
subtypes of renal cell carcinoma**

**Epigenetics 2012; 8(3)**

**<http://dx.doi.org/10.4161/epi.23817>**

**[http://www.landesbioscience.com/journals/epigenetics/  
article/23817/](http://www.landesbioscience.com/journals/epigenetics/article/23817/)**

# Supplementary Figure 1

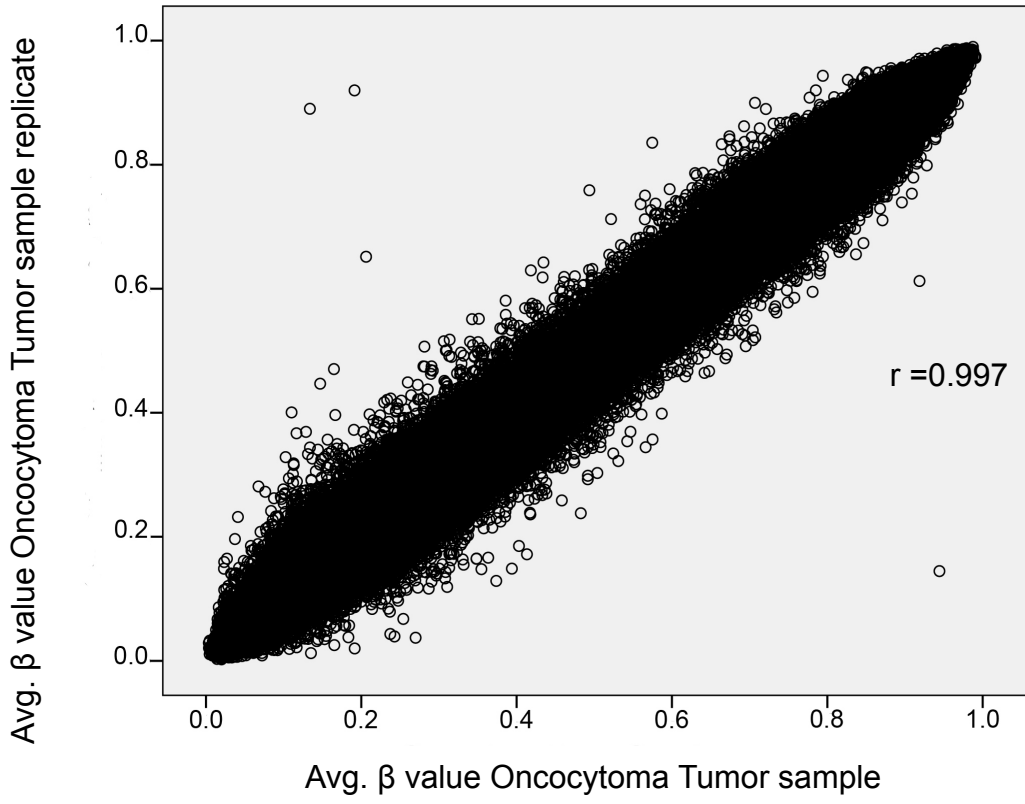

Supplementary Figure 2

**BCN1**: cg0271376, cg07016258, cg06523224, cg17124224, cg26654798, cg26429925

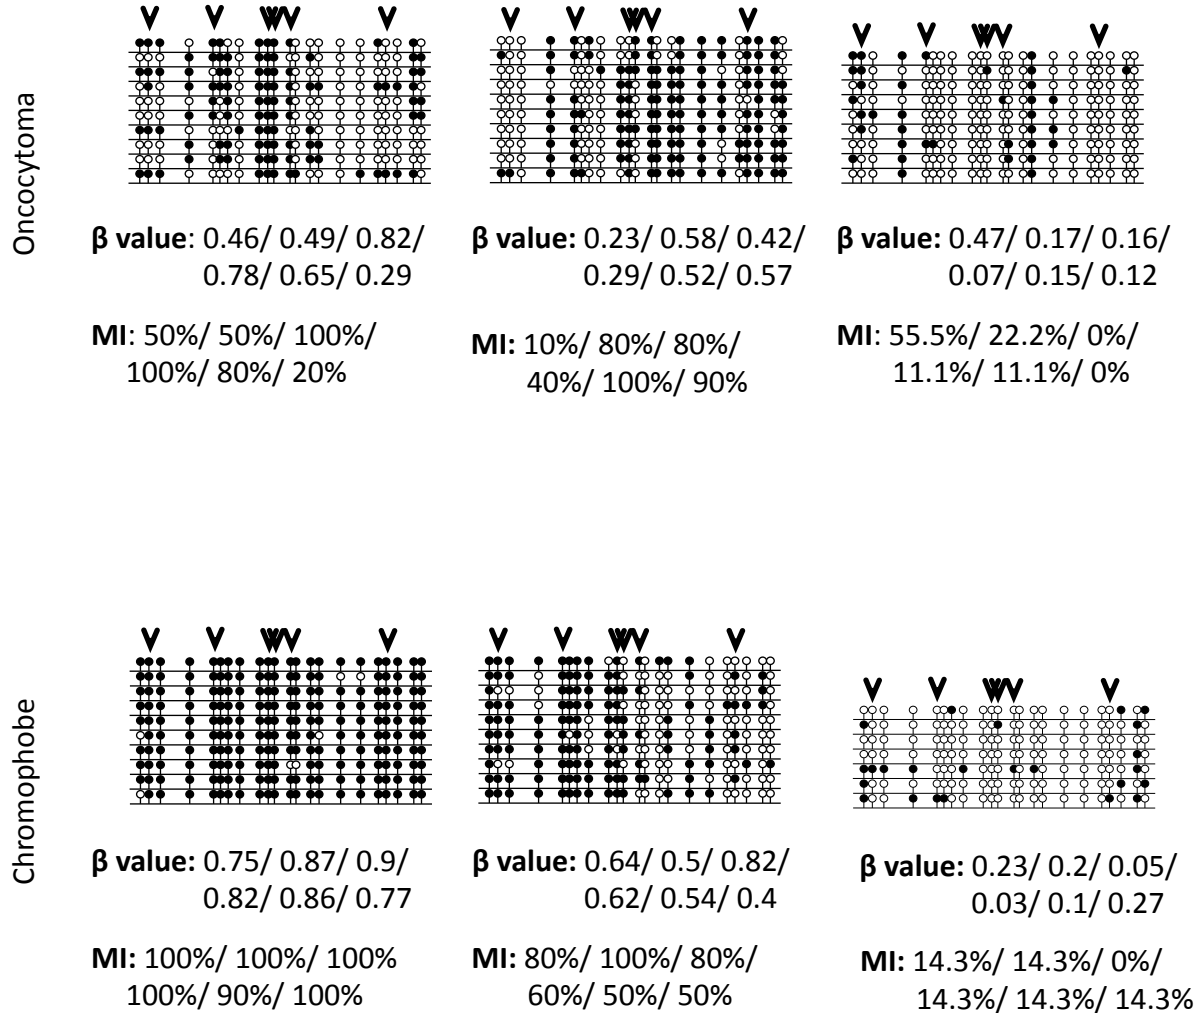

# Supplementary Figure 3

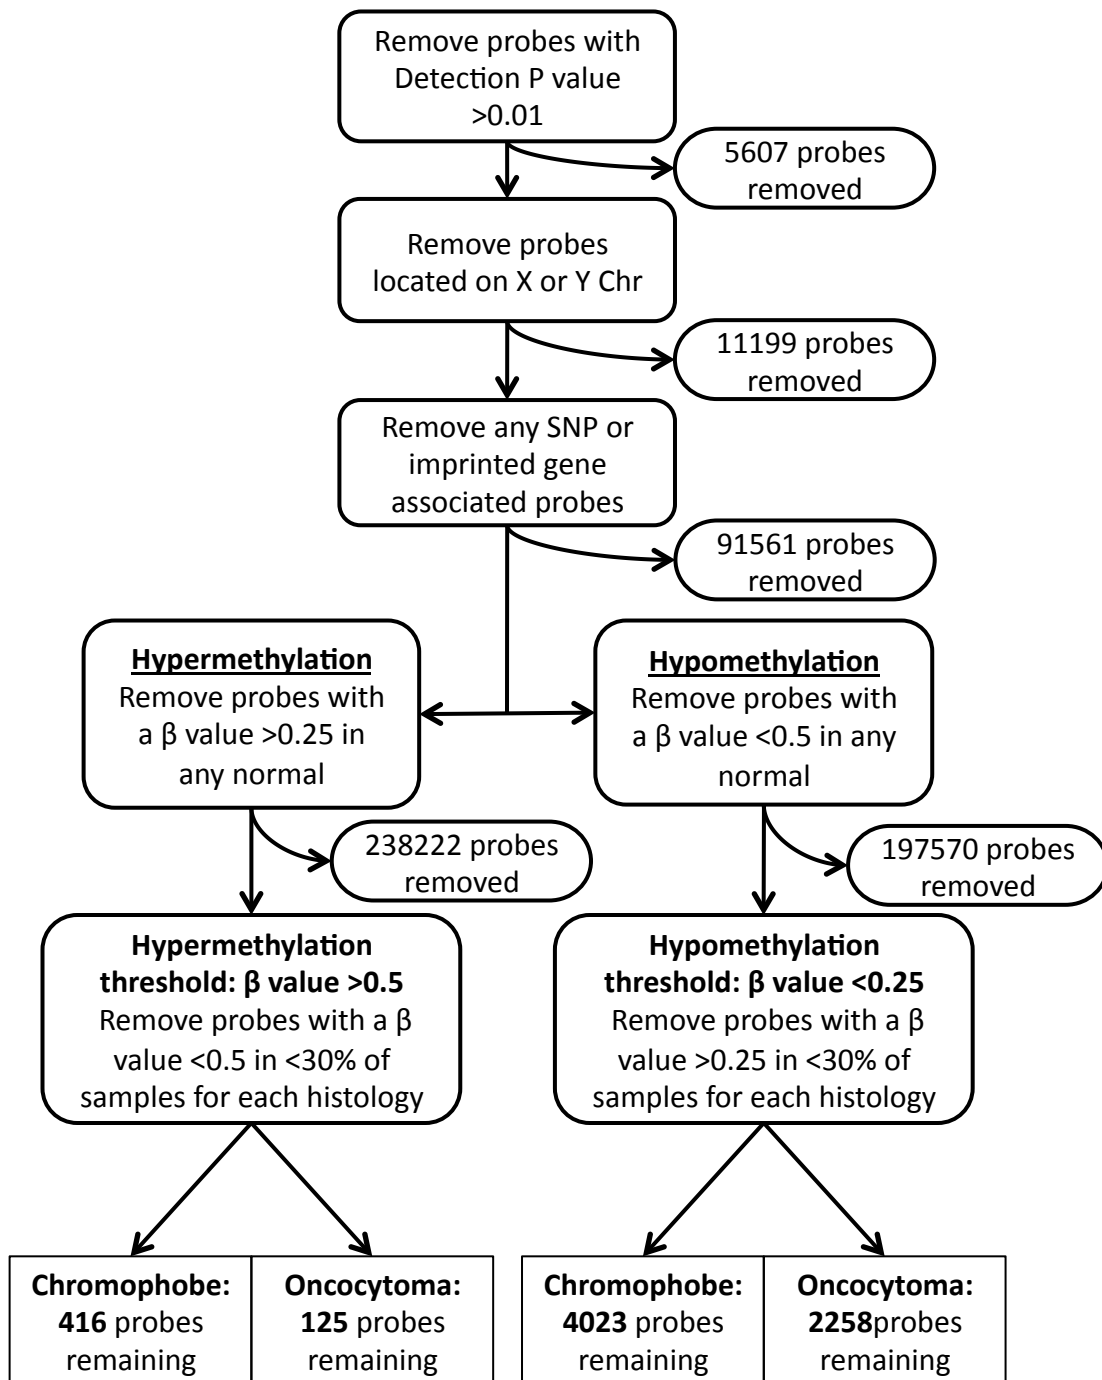

Suppl Figure 4  
Ingenuity associated functional networks of genes hypomethylated in >30% Chromophobe samples

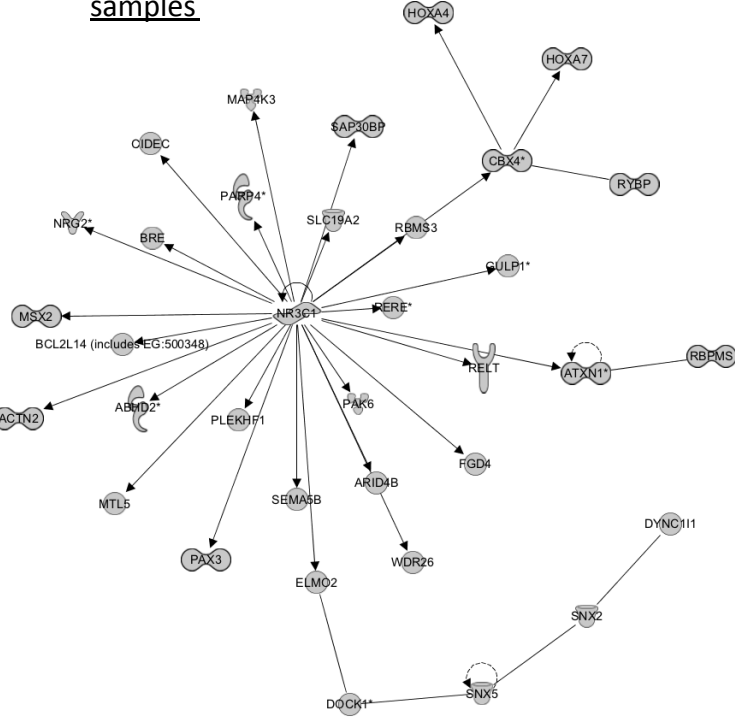

**Network 1: 35 genes**  
**Top functions:** Cell to cell signaling, Hereditary disorders, Neurological disease.

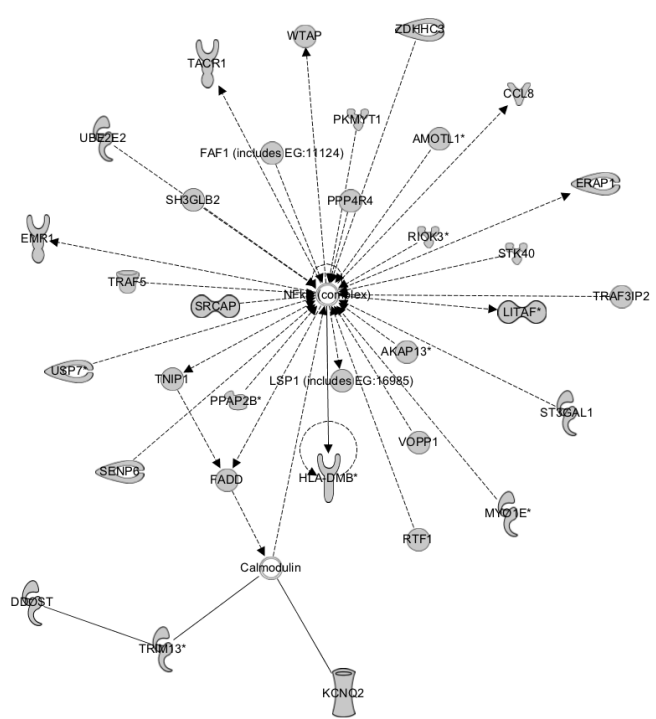

**Network 2: 33 genes**  
**Top functions:** post-translational modification, Hereditary disorder, Neurological disease.

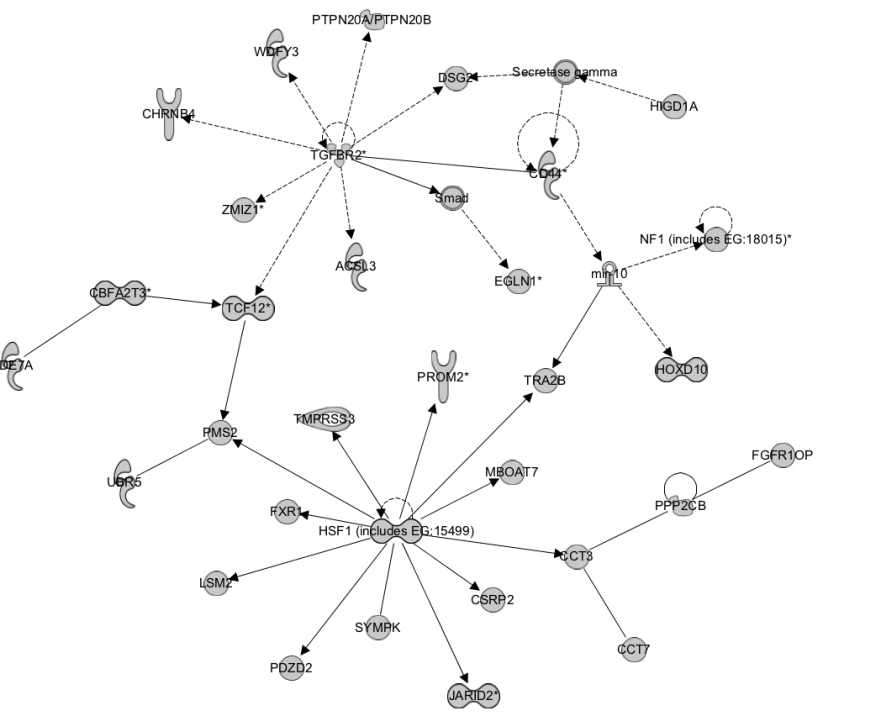

**Network 3: 33 genes**  
**Top functions:** Tissue morphology, Cancer, Gastrointestinal disease.

**Legend**

- Cytokine/ Growth Factor
- Enzyme
- Kinase
- Peptidase
- G-Protein coupled receptor
- Transmembrane receptor
- Ion Channel
- Transporter
- Transcription regulator
- MircoRNA
- Complex/ Group
- Other

Suppl Figure 5

Ingenuity associated functional networks of genes hypomethylated in >30% Oncocytoma samples

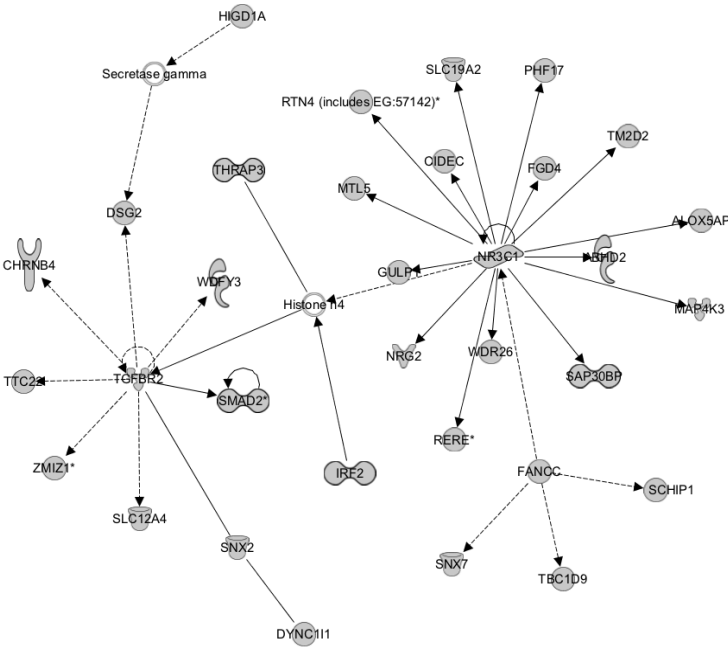

**Network 1:** 33 genes

**Top functions:** Hereditary disorder, Neurological disease, Skeletal and muscular disorders.

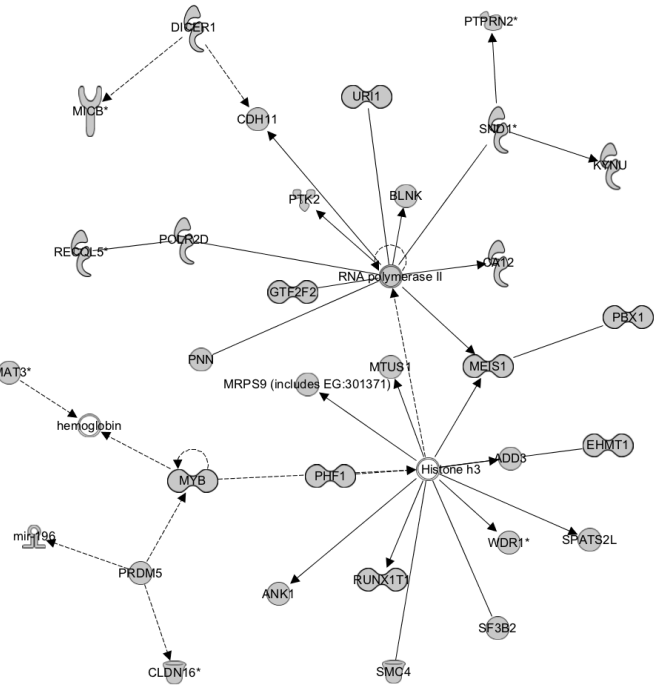

**Network 2:** 33 genes

**Top functions:** Cancer, Cellular development, Cellular Function and Maintenance.

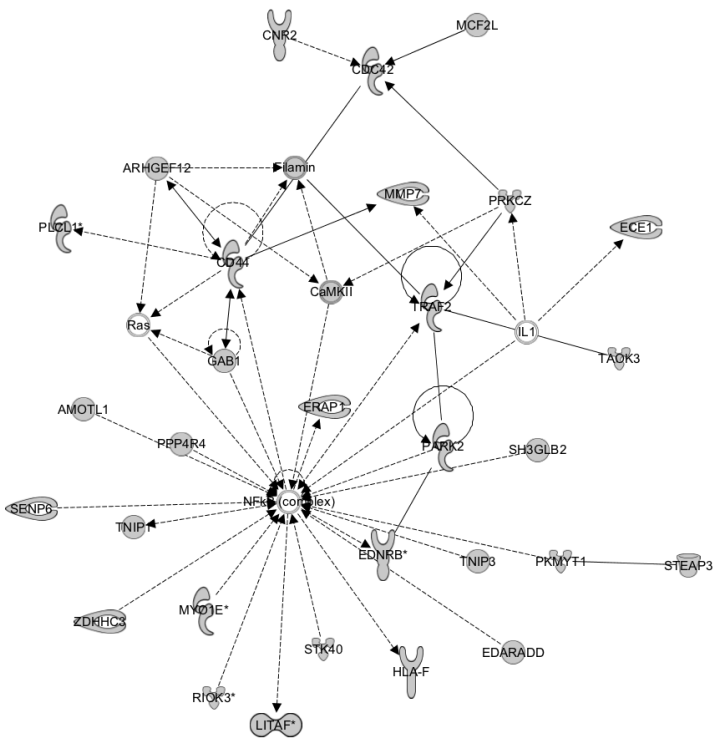

**Network 3:** 30 genes

**Top functions:** Embryonic development, Lymphoid tissue structure and development, Organ development.

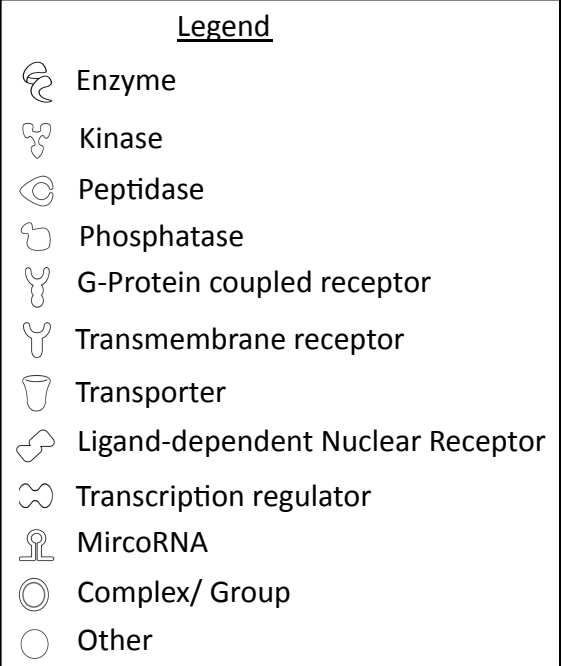

Supplementary Table 1: Gene list of all probes methylated in >30% chromophobe

| Gene      | Cancer | TargetID   | CHR | Prevalance   | Frequently Methylated in other Kidney Cancers |
|-----------|--------|------------|-----|--------------|-----------------------------------------------|
| ABI3BP    | Ch     | cg15028548 | 3   | 6/20 30.00%  |                                               |
| ACN9      | Ch     | cg10548492 | 7   | 7/20 35.00%  |                                               |
| ADAM5P    | Ch     | cg14742937 | 8   | 7/20 35.00%  |                                               |
| ADAMTS14  | Ch     | cg04838832 | 10  | 9/20 45.00%  |                                               |
| ADAR      | Ch     | cg13392022 | 1   | 6/20 30.00%  |                                               |
| AFF1      | Ch     | cg17455261 | 4   | 8/20 40.00%  |                                               |
| AGAP1     | Ch     | cg17945789 | 2   | 11/20 55.00% |                                               |
| ALX1      | Ch     | cg13916459 | 12  | 6/20 30.00%  |                                               |
| AMH       | Ch     | cg05345154 | 19  | 6/20 30.00%  |                                               |
| ARHGAP10  | Ch     | cg11713658 | 4   | 7/20 35.00%  |                                               |
| ARHGAP25  | Ch     | cg12093662 | 2   | 6/20 30.00%  |                                               |
| ASCL2     | Ch     | cg10290276 | 11  | 6/20 30.00%  | E et al 2012 PMID: 22610075                   |
| ATP6V1B1  | Ch     | cg04751811 | 2   | 11/20 55.00% |                                               |
| ATP6V1B1  | Ch     | cg06288697 | 2   | 15/20 75.00% |                                               |
| BAG2      | Ch     | cg10230427 | 6   | 7/20 35.00%  |                                               |
| BAG2      | Ch     | cg27164797 | 6   | 6/20 30.00%  |                                               |
| BTNL9     | Ch     | cg16049690 | 5   | 6/20 30.00%  |                                               |
| C16orf68  | Ch     | cg04616793 | 16  | 7/20 35.00%  |                                               |
| C17orf101 | Ch     | cg21525032 | 17  | 7/20 35.00%  |                                               |
| C17orf95  | Ch     | cg27000944 | 17  | 7/20 35.00%  |                                               |
| C1orf14   | Ch     | cg08146495 | 1   | 6/20 30.00%  |                                               |
| C20orf54  | Ch     | cg11959399 | 20  | 6/20 30.00%  |                                               |
| C22orf27  | Ch     | cg08837037 | 22  | 6/20 30.00%  |                                               |
| C2CD4D    | Ch     | cg04296699 | 1   | 6/20 30.00%  |                                               |
| C2CD4D    | Ch     | cg15015892 | 1   | 7/20 35.00%  |                                               |
| C2orf43   | Ch     | cg14757738 | 2   | 10/20 50.00% |                                               |
| C6orf27   | Ch     | cg13187827 | 6   | 7/20 35.00%  |                                               |
| C7orf58   | Ch     | cg01597480 | 7   | 8/20 40.00%  |                                               |
| CACNA1A   | Ch     | cg11660879 | 19  | 6/20 30.00%  |                                               |
| CACNG7    | Ch     | cg21477176 | 19  | 6/20 30.00%  |                                               |
| CAPN2     | Ch     | cg06756211 | 1   | 13/20 65.00% |                                               |
| CCDC140   | Ch     | cg09486778 | 2   | 7/20 35.00%  |                                               |
| CCDC64B   | Ch     | cg14134732 | 16  | 6/20 30.00%  |                                               |
| CCDC69    | Ch     | cg08317263 | 5   | 6/20 30.00%  |                                               |
| CCK       | Ch     | cg16864658 | 3   | 9/20 45.00%  |                                               |
| CDX2      | Ch     | cg00806704 | 13  | 7/20 35.00%  |                                               |
| CHD9      | Ch     | cg09608652 | 16  | 6/20 30.00%  |                                               |
| CHRM2     | Ch     | cg13102079 | 7   | 6/20 30.00%  |                                               |
| CHST8     | Ch     | cg22335692 | 19  | 6/20 30.00%  |                                               |
| CLEC11A   | Ch     | cg13152535 | 19  | 7/20 35.00%  |                                               |
| CMTM3     | Ch     | cg26560414 | 16  | 6/20 30.00%  |                                               |
| COL4A1    | Ch     | cg23008352 | 13  | 7/20 35.00%  |                                               |
| CPT1A     | Ch     | cg13786863 | 11  | 7/20 35.00%  |                                               |
| CRY2      | Ch     | cg16006220 | 11  | 6/20 30.00%  |                                               |
| CSDAP1    | Ch     | cg06301178 | 16  | 6/20 30.00%  |                                               |

|          |    |            |    |       |        |                       |
|----------|----|------------|----|-------|--------|-----------------------|
| CSRP2    | Ch | cg21484956 | 12 | 6/20  | 30.00% |                       |
| CUX1     | Ch | cg02856420 | 7  | 10/20 | 50.00% |                       |
| CXCL14   | Ch | cg04002608 | 5  | 9/20  | 45.00% |                       |
| DBC1     | Ch | cg03625109 | 9  | 7/20  | 35.00% |                       |
| DCHS2    | Ch | cg11934170 | 4  | 6/20  | 30.00% |                       |
| DENND3   | Ch | cg24476153 | 8  | 7/20  | 35.00% |                       |
| DLGAP3   | Ch | cg00114029 | 1  | 6/20  | 30.00% |                       |
| DLGAP3   | Ch | cg18852567 | 1  | 8/20  | 40.00% |                       |
| DLGAP3   | Ch | cg26228266 | 1  | 7/20  | 35.00% |                       |
| DLX1     | Ch | cg17737681 | 2  | 7/20  | 35.00% |                       |
| DLX4     | Ch | cg11472521 | 17 | 6/20  | 30.00% |                       |
| DPP4     | Ch | cg19350270 | 2  | 7/20  | 35.00% |                       |
| DQX1     | Ch | cg05652569 | 2  | 6/20  | 30.00% |                       |
| DRD4     | Ch | cg06299284 | 11 | 6/20  | 30.00% |                       |
| ELTD1    | Ch | cg15084543 | 1  | 12/20 | 60.00% |                       |
| EN2      | Ch | cg12034383 | 7  | 6/20  | 30.00% |                       |
| EPS8L1   | Ch | cg08166750 | 19 | 8/20  | 40.00% |                       |
| EPS8L1   | Ch | cg12020396 | 19 | 11/20 | 55.00% |                       |
| EPS8L1   | Ch | cg18320766 | 19 | 12/20 | 60.00% |                       |
| EPS8L2   | Ch | cg08327690 | 11 | 9/20  | 45.00% |                       |
| EVX2     | Ch | cg07536910 | 2  | 7/20  | 35.00% |                       |
| FAM123A  | Ch | cg18815647 | 13 | 6/20  | 30.00% |                       |
| FAM125A  | Ch | cg02217814 | 19 | 6/20  | 30.00% |                       |
| FBLL1    | Ch | cg13954457 | 5  | 8/20  | 40.00% |                       |
| FHL3     | Ch | cg24519393 | 1  | 7/20  | 35.00% |                       |
| FLJ22536 | Ch | cg08233811 | 6  | 6/20  | 30.00% |                       |
| FLJ22536 | Ch | cg26158950 | 6  | 6/20  | 30.00% |                       |
| FLJ37453 | Ch | cg25980637 | 1  | 6/20  | 30.00% |                       |
| FOXL2    | Ch | cg07135614 | 3  | 6/20  | 30.00% |                       |
| GCM2     | Ch | cg10074727 | 6  | 6/20  | 30.00% |                       |
| GDF6     | Ch | cg02246426 | 8  | 11/20 | 55.00% |                       |
| GIPC2    | Ch | cg01074657 | 1  | 10/20 | 50.00% |                       |
| GJA3     | Ch | cg22900415 | 13 | 6/20  | 30.00% |                       |
| GJB2     | Ch | cg00347757 | 13 | 6/20  | 30.00% |                       |
| GPRIN1   | Ch | cg11214757 | 5  | 6/20  | 30.00% |                       |
| GRIK2    | Ch | cg21635870 | 6  | 8/20  | 40.00% |                       |
| GUCY1B3  | Ch | cg04040095 | 4  | 7/20  | 35.00% |                       |
| GUCY1B3  | Ch | cg18129755 | 4  | 7/20  | 35.00% |                       |
| GYPC     | Ch | cg04453971 | 2  | 7/20  | 35.00% |                       |
| HAPLN1   | Ch | cg12199221 | 5  | 6/20  | 30.00% |                       |
| HHEX     | Ch | cg02185052 | 10 | 9/20  | 45.00% |                       |
| HHEX     | Ch | cg09721427 | 10 | 6/20  | 30.00% |                       |
| HOXA2    | Ch | cg02225599 | 7  | 8/20  | 40.00% |                       |
| HOXA3    | Ch | cg21134232 | 7  | 6/20  | 30.00% |                       |
| HOXA9    | Ch | cg03217995 | 7  | 8/20  | 40.00% | McRonald.F et al 2009 |
| HOXC10   | Ch | cg20402783 | 12 | 9/20  | 45.00% |                       |
| HOXC4    | Ch | cg19164987 | 12 | 7/20  | 35.00% |                       |
| HOXC5    | Ch | cg07080050 | 12 | 6/20  | 30.00% |                       |
| HSPB9    | Ch | cg08880849 | 17 | 8/20  | 40.00% |                       |



|              |    |            |    |       |        |                              |
|--------------|----|------------|----|-------|--------|------------------------------|
| HTR2A        | Ch | cg15894389 | 13 | 6/20  | 30.00% |                              |
| IGF2BP1      | Ch | cg02745847 | 17 | 7/20  | 35.00% |                              |
| IRX6         | Ch | cg01064265 | 16 | 7/20  | 35.00% |                              |
| JSRP1        | Ch | cg04887494 | 19 | 6/20  | 30.00% |                              |
| KCNH3        | Ch | cg27382405 | 12 | 8/20  | 40.00% |                              |
| KCNJ8        | Ch | cg03352106 | 12 | 16/20 | 80.00% |                              |
| KCNJ8        | Ch | cg16739441 | 12 | 9/20  | 45.00% |                              |
| KCNK2        | Ch | cg05129325 | 1  | 6/20  | 30.00% |                              |
| KCNK2        | Ch | cg11200222 | 1  | 9/20  | 45.00% |                              |
| KCNQ4        | Ch | cg19689322 | 1  | 6/20  | 30.00% |                              |
| KRT27        | Ch | cg02399249 | 17 | 6/20  | 30.00% |                              |
| LASP1        | Ch | cg04569429 | 17 | 6/20  | 30.00% |                              |
| LBX1         | Ch | cg03053579 | 10 | 6/20  | 30.00% |                              |
| LHX2         | Ch | cg14425564 | 9  | 8/20  | 40.00% |                              |
| LHX8         | Ch | cg11842415 | 1  | 6/20  | 30.00% |                              |
| LMO2         | Ch | cg06148118 | 11 | 7/20  | 35.00% |                              |
| LOC100130522 | Ch | cg12061113 | 18 | 7/20  | 35.00% |                              |
| LOC100132111 | Ch | cg24051554 | 1  | 8/20  | 40.00% |                              |
| LOC645323    | Ch | cg03632704 | 5  | 7/20  | 35.00% |                              |
| LOC645323    | Ch | cg12991050 | 5  | 6/20  | 30.00% |                              |
| LOC645323    | Ch | cg13982098 | 5  | 7/20  | 35.00% |                              |
| LRRC32       | Ch | cg01439670 | 11 | 6/20  | 30.00% |                              |
| LRRC32       | Ch | cg13633560 | 11 | 6/20  | 30.00% |                              |
| LYPD5        | Ch | cg11898486 | 19 | 7/20  | 35.00% |                              |
| MAML2        | Ch | cg24088496 | 11 | 8/20  | 40.00% |                              |
| MANEAL       | Ch | cg00664416 | 1  | 6/20  | 30.00% |                              |
| MEOX2        | Ch | cg07395354 | 7  | 7/20  | 35.00% |                              |
| MKX          | Ch | cg08423533 | 10 | 7/20  | 35.00% |                              |
| MKX          | Ch | cg26298409 | 10 | 6/20  | 30.00% |                              |
| MRC2         | Ch | cg24368031 | 17 | 9/20  | 45.00% |                              |
| MYO3A        | Ch | cg02232704 | 10 | 6/20  | 30.00% |                              |
| NCKAP5       | Ch | cg02715592 | 2  | 7/20  | 35.00% |                              |
| NEUROD1      | Ch | cg01897496 | 2  | 7/20  | 35.00% |                              |
| NFE2L3       | Ch | cg10536999 | 7  | 8/20  | 40.00% |                              |
| NKAPL        | Ch | cg17384889 | 6  | 6/20  | 30.00% |                              |
| NKX1-2       | Ch | cg00486352 | 10 | 6/20  | 30.00% |                              |
| NKX6-2       | Ch | cg11174855 | 10 | 7/20  | 35.00% | E et al 2012 PMID: 22610075  |
| NOS1         | Ch | cg17119907 | 12 | 7/20  | 35.00% |                              |
| NPHP4        | Ch | cg20383686 | 1  | 6/20  | 30.00% |                              |
| NR2E1        | Ch | cg18569734 | 6  | 6/20  | 30.00% |                              |
| OTP          | Ch | cg16703762 | 5  | 6/20  | 30.00% |                              |
| OTX2         | Ch | cg13023623 | 14 | 8/20  | 40.00% |                              |
| OTX2         | Ch | cg15607672 | 14 | 7/20  | 35.00% |                              |
| PACS2        | Ch | cg22976533 | 14 | 8/20  | 40.00% |                              |
| PARD3        | Ch | cg15292765 | 10 | 17/20 | 85.00% |                              |
| PAX3         | Ch | cg13767755 | 2  | 6/20  | 30.00% |                              |
| PAX3         | Ch | cg14093610 | 2  | 6/20  | 30.00% |                              |
| PAX5         | Ch | cg03261800 | 9  | 8/20  | 40.00% |                              |
| PCDH17       | Ch | cg12432236 | 13 | 6/20  | 30.00% | VL et al 2011 PMID: 21847011 |

|          |    |            |    |              |                       |
|----------|----|------------|----|--------------|-----------------------|
| PCDHA12  | Ch | cg09852127 | 5  | 7/20 35.00%  |                       |
| PCDHA7   | Ch | cg02051771 | 5  | 6/20 30.00%  |                       |
| PCDHB15  | Ch | cg10757144 | 5  | 7/20 35.00%  |                       |
| PCDHB17  | Ch | cg21777188 | 5  | 6/20 30.00%  |                       |
| PCDHB3   | Ch | cg24586758 | 5  | 10/20 50.00% |                       |
| PCDHGA2  | Ch | cg18781988 | 5  | 8/20 40.00%  |                       |
| PCDHGA4  | Ch | cg06757585 | 5  | 7/20 35.00%  |                       |
| PCSK6    | Ch | cg07324702 | 15 | 14/20 70.00% |                       |
| PDE4D    | Ch | cg03323696 | 5  | 6/20 30.00%  |                       |
| PHACTR1  | Ch | cg13246235 | 6  | 9/20 45.00%  |                       |
| PHOX2B   | Ch | cg01416712 | 4  | 8/20 40.00%  |                       |
| PHOX2B   | Ch | cg05323533 | 4  | 8/20 40.00%  |                       |
| PITX1    | Ch | cg00396667 | 5  | 6/20 30.00%  |                       |
| PITX2    | Ch | cg08979895 | 4  | 6/20 30.00%  | McRonald.F et al 2009 |
| PM20D1   | Ch | cg11965913 | 1  | 8/20 40.00%  |                       |
| PPP2R2A  | Ch | cg08201604 | 8  | 7/20 35.00%  |                       |
| PRDM13   | Ch | cg01815538 | 6  | 6/20 30.00%  |                       |
| PRDM16   | Ch | cg03254465 | 1  | 8/20 40.00%  |                       |
| PRDM16   | Ch | cg09990962 | 1  | 10/20 50.00% |                       |
| PRDM16   | Ch | cg14200569 | 1  | 10/20 50.00% |                       |
| PRKCDBP  | Ch | cg26678920 | 11 | 7/20 35.00%  |                       |
| PROCA1   | Ch | cg02685896 | 17 | 11/20 55.00% |                       |
| PROCA1   | Ch | cg14676825 | 17 | 10/20 50.00% |                       |
| PRR5     | Ch | cg24019054 | 22 | 7/20 35.00%  |                       |
| PRRT1    | Ch | cg22897615 | 6  | 6/20 30.00%  |                       |
| PSKH2    | Ch | cg09506473 | 8  | 6/20 30.00%  |                       |
| PTHLH    | Ch | cg10253371 | 12 | 8/20 40.00%  |                       |
| PTPRD    | Ch | cg09371281 | 9  | 6/20 30.00%  |                       |
| PTPRD    | Ch | cg14458619 | 9  | 7/20 35.00%  |                       |
| RAB37    | Ch | cg16347279 | 17 | 6/20 30.00%  |                       |
| RALYL    | Ch | cg22403811 | 8  | 6/20 30.00%  |                       |
| RASA3    | Ch | cg14696311 | 13 | 11/20 55.00% |                       |
| RAX      | Ch | cg03671802 | 18 | 6/20 30.00%  |                       |
| RBM20    | Ch | cg08692733 | 10 | 6/20 30.00%  |                       |
| RRBP1    | Ch | cg26447697 | 20 | 6/20 30.00%  |                       |
| SALL1    | Ch | cg08304084 | 16 | 12/20 60.00% |                       |
| SCMH1    | Ch | cg00826203 | 1  | 6/20 30.00%  |                       |
| SDK1     | Ch | cg16956686 | 7  | 9/20 45.00%  |                       |
| SDK1     | Ch | cg24796546 | 7  | 8/20 40.00%  |                       |
| SDK2     | Ch | cg06061257 | 17 | 7/20 35.00%  |                       |
| SEMA4A   | Ch | cg05047401 | 1  | 6/20 30.00%  |                       |
| SH3PXD2A | Ch | cg18735015 | 10 | 6/20 30.00%  |                       |
| SH3RF3   | Ch | cg18145759 | 2  | 7/20 35.00%  |                       |
| SHANK2   | Ch | cg26591930 | 11 | 7/20 35.00%  |                       |
| SIAH3    | Ch | cg26667946 | 13 | 6/20 30.00%  |                       |
| SIM1     | Ch | cg08074534 | 6  | 6/20 30.00%  |                       |
| SIX2     | Ch | cg24887265 | 2  | 6/20 30.00%  |                       |
| SKAP2    | Ch | cg03730533 | 7  | 7/20 35.00%  |                       |
| SLC16A12 | Ch | cg03616221 | 10 | 7/20 35.00%  |                       |

|          |    |            |    |       |        |                     |
|----------|----|------------|----|-------|--------|---------------------|
| SLC2A14  | Ch | cg06645921 | 12 | 9/20  | 45.00% |                     |
| SLC2A3   | Ch | cg20972214 | 12 | 8/20  | 40.00% |                     |
| SLC2A9   | Ch | cg25117600 | 4  | 10/20 | 50.00% |                     |
| SLFN12L  | Ch | cg22763680 | 17 | 6/20  | 30.00% |                     |
| SLITRK1  | Ch | cg16727923 | 13 | 7/20  | 35.00% |                     |
| SOX1     | Ch | cg16705627 | 13 | 6/20  | 30.00% |                     |
| SOX2OT   | Ch | cg24513480 | 3  | 8/20  | 40.00% |                     |
| SPG20    | Ch | cg10558887 | 13 | 7/20  | 35.00% |                     |
| SRCIN1   | Ch | cg19409060 | 17 | 7/20  | 35.00% |                     |
| TAF13    | Ch | cg20569839 | 1  | 6/20  | 30.00% |                     |
| TBCD     | Ch | cg00960700 | 17 | 6/20  | 30.00% |                     |
| TCTEX1D1 | Ch | cg09769134 | 1  | 7/20  | 35.00% |                     |
| TET1     | Ch | cg02952701 | 10 | 8/20  | 40.00% |                     |
| TET1     | Ch | cg22876739 | 10 | 7/20  | 35.00% |                     |
| TFAP2B   | Ch | cg00908833 | 6  | 6/20  | 30.00% |                     |
| TFAP2B   | Ch | cg03159396 | 6  | 12/20 | 60.00% |                     |
| TFAP2B   | Ch | cg05437823 | 6  | 8/20  | 40.00% |                     |
| TFAP2B   | Ch | cg08178940 | 6  | 14/20 | 70.00% |                     |
| TFAP2B   | Ch | cg08857063 | 6  | 8/20  | 40.00% |                     |
| TFAP2B   | Ch | cg17343563 | 6  | 11/20 | 55.00% |                     |
| TFAP2B   | Ch | cg17507887 | 6  | 7/20  | 35.00% |                     |
| TFAP2B   | Ch | cg22282405 | 6  | 9/20  | 45.00% |                     |
| THBS4    | Ch | cg19025234 | 5  | 6/20  | 30.00% |                     |
| TLX3     | Ch | cg25942450 | 5  | 7/20  | 35.00% | Ricketts et al 2012 |
| TMC2     | Ch | cg07341624 | 20 | 6/20  | 30.00% |                     |
| TMEM171  | Ch | cg10795659 | 5  | 9/20  | 45.00% |                     |
| TMEM37   | Ch | cg09474442 | 2  | 6/20  | 30.00% |                     |
| TMEM37   | Ch | cg09715353 | 2  | 9/20  | 45.00% |                     |
| TOX2     | Ch | cg10900455 | 20 | 6/20  | 30.00% |                     |
| TRIL     | Ch | cg02624770 | 7  | 6/20  | 30.00% |                     |
| TRIM10   | Ch | cg16912957 | 6  | 8/20  | 40.00% |                     |
| TRIM10   | Ch | cg18420781 | 6  | 6/20  | 30.00% |                     |
| TRIM46   | Ch | cg15497761 | 1  | 6/20  | 30.00% |                     |
| TRIM59   | Ch | cg15618978 | 3  | 6/20  | 30.00% |                     |
| TUBGCP6  | Ch | cg19851816 | 22 | 7/20  | 35.00% |                     |
| TULP1    | Ch | cg24281267 | 6  | 10/20 | 50.00% |                     |
| TXNRD1   | Ch | cg09884423 | 12 | 6/20  | 30.00% |                     |
| VPS37B   | Ch | cg16953816 | 12 | 18/20 | 90.00% |                     |
| VSX1     | Ch | cg02898293 | 20 | 6/20  | 30.00% |                     |
| ZC3H12D  | Ch | cg09313931 | 6  | 7/20  | 35.00% |                     |
| ZC3H12D  | Ch | cg10308253 | 6  | 7/20  | 35.00% |                     |
| ZC3H12D  | Ch | cg15559674 | 6  | 11/20 | 55.00% |                     |
| ZEB2     | Ch | cg09596336 | 2  | 6/20  | 30.00% |                     |
| ZFHX3    | Ch | cg08512490 | 16 | 8/20  | 40.00% |                     |
| ZFHX3    | Ch | cg16630989 | 16 | 7/20  | 35.00% |                     |
| ZIC1     | Ch | cg05095591 | 3  | 6/20  | 30.00% |                     |
| ZIC2     | Ch | cg24742746 | 13 | 7/20  | 35.00% |                     |
| ZIC4     | Ch | cg01137401 | 3  | 7/20  | 35.00% |                     |
| ZIC4     | Ch | cg04556126 | 3  | 6/20  | 30.00% |                     |

|        |    |            |    |             |                     |
|--------|----|------------|----|-------------|---------------------|
| ZNF177 | Ch | cg09578475 | 19 | 6/20 30.00% | Ricketts et al 2012 |
| ZNF83  | Ch | cg17132967 | 19 | 6/20 30.00% |                     |

Suppl Table 2: Gene list of all probes methylated in >30% oncocytoma Samples

| Gene     | Cancer | TargetID   | CHR | Prevalance   | Frequently Methylated in other Kidney Cancers |
|----------|--------|------------|-----|--------------|-----------------------------------------------|
| ACBD4    | Onco   | cg00677574 | 17  | 10/21 47.62% |                                               |
| ACBD5    | Onco   | cg14240646 | 10  | 7/21 33.33%  |                                               |
| ACN9     | Onco   | cg10548492 | 7   | 7/21 33.33%  |                                               |
| ACP5     | Onco   | cg04566159 | 19  | 7/21 33.33%  |                                               |
| ADAMTS14 | Onco   | cg04838832 | 10  | 7/21 33.33%  |                                               |
| AFF1     | Onco   | cg17455261 | 4   | 9/21 42.86%  |                                               |
| AGAP1    | Onco   | cg17945789 | 2   | 13/21 61.90% |                                               |
| ALCAM    | Onco   | cg05645404 | 3   | 12/21 57.14% |                                               |
| ARHGAP10 | Onco   | cg11713658 | 4   | 12/21 57.14% |                                               |
| ASB4     | Onco   | cg02805025 | 7   | 11/21 52.38% |                                               |
| ATP6V1B1 | Onco   | cg04751811 | 2   | 14/21 66.67% |                                               |
| ATP6V1B1 | Onco   | cg06288697 | 2   | 15/21 71.43% |                                               |
| C14orf64 | Onco   | cg16278496 | 14  | 7/21 33.33%  |                                               |
| C2orf43  | Onco   | cg14757738 | 2   | 9/21 42.86%  |                                               |
| CAPN2    | Onco   | cg06756211 | 1   | 12/21 57.14% |                                               |
| CCND3    | Onco   | cg04111789 | 6   | 9/21 42.86%  |                                               |
| CMTM3    | Onco   | cg26560414 | 16  | 8/21 38.10%  |                                               |
| COL4A1   | Onco   | cg23008352 | 13  | 11/21 52.38% |                                               |
| CUX1     | Onco   | cg02856420 | 7   | 7/21 33.33%  |                                               |
| CXCL14   | Onco   | cg04002608 | 5   | 9/21 42.86%  |                                               |
| ELTD1    | Onco   | cg15084543 | 1   | 11/21 52.38% |                                               |
| EPS8L1   | Onco   | cg08166750 | 19  | 8/21 38.10%  |                                               |
| EPS8L1   | Onco   | cg12020396 | 19  | 12/21 57.14% |                                               |
| EPS8L1   | Onco   | cg18320766 | 19  | 15/21 71.43% |                                               |
| EPS8L2   | Onco   | cg08327690 | 11  | 10/21 47.62% |                                               |
| GAD1     | Onco   | cg04105250 | 2   | 9/21 42.86%  |                                               |
| GIPC2    | Onco   | cg01074657 | 1   | 7/21 33.33%  |                                               |
| GRIK2    | Onco   | cg21635870 | 6   | 10/21 47.62% |                                               |
| HOXA2    | Onco   | cg02225599 | 7   | 12/21 57.14% |                                               |
| HOXA3    | Onco   | cg21134232 | 7   | 9/21 42.86%  |                                               |
| HOXC10   | Onco   | cg20402783 | 12  | 8/21 38.10%  |                                               |
| KCNQ4    | Onco   | cg19689322 | 1   | 9/21 42.86%  |                                               |
| MAML2    | Onco   | cg24088496 | 11  | 15/21 71.43% |                                               |
| MFHAS1   | Onco   | cg27280535 | 8   | 7/21 33.33%  |                                               |
| MIR196A1 | Onco   | cg26608174 | 17  | 10/21 47.62% |                                               |
| NFE2L3   | Onco   | cg10536999 | 7   | 10/21 47.62% |                                               |
| NRG2     | Onco   | cg02009088 | 5   | 14/21 66.67% |                                               |
| NRG2     | Onco   | cg05652757 | 5   | 11/21 52.38% |                                               |
| NRG2     | Onco   | cg10468961 | 5   | 9/21 42.86%  |                                               |
| NRG2     | Onco   | cg15992535 | 5   | 16/21 76.19% |                                               |
| NRG2     | Onco   | cg22060611 | 5   | 8/21 38.10%  |                                               |
| PACS2    | Onco   | cg22976533 | 14  | 8/21 38.10%  |                                               |
| PARD3    | Onco   | cg15292765 | 10  | 17/21 80.95% |                                               |
| PARD3    | Onco   | cg16895672 | 10  | 7/21 33.33%  |                                               |
| PCDHB17  | Onco   | cg21777188 | 5   | 9/21 42.86%  |                                               |
| PCDHGA2  | Onco   | cg18781988 | 5   | 7/21 33.33%  |                                               |

|          |      |            |    |       |        |
|----------|------|------------|----|-------|--------|
| PCDHGA4  | Onco | cg21627409 | 5  | 9/21  | 42.86% |
| PCSK6    | Onco | cg07324702 | 15 | 9/21  | 42.86% |
| PDE4D    | Onco | cg03323696 | 5  | 8/21  | 38.10% |
| PHACTR1  | Onco | cg13246235 | 6  | 7/21  | 33.33% |
| PRDM16   | Onco | cg03254465 | 1  | 8/21  | 38.10% |
| PRDM16   | Onco | cg09990962 | 1  | 12/21 | 57.14% |
| PRDM16   | Onco | cg14200569 | 1  | 10/21 | 47.62% |
| PRDM16   | Onco | cg24939838 | 1  | 7/21  | 33.33% |
| PROCA1   | Onco | cg02685896 | 17 | 8/21  | 38.10% |
| PROCA1   | Onco | cg14676825 | 17 | 10/21 | 47.62% |
| PYY      | Onco | cg16789592 | 17 | 8/21  | 38.10% |
| RPH3A    | Onco | cg01573562 | 12 | 9/21  | 42.86% |
| SALL1    | Onco | cg08304084 | 16 | 16/21 | 76.19% |
| SCMH1    | Onco | cg00826203 | 1  | 10/21 | 47.62% |
| SDS      | Onco | cg14120215 | 12 | 8/21  | 38.10% |
| SHANK2   | Onco | cg26591930 | 11 | 12/21 | 57.14% |
| SIM1     | Onco | cg08074534 | 6  | 8/21  | 38.10% |
| SKAP2    | Onco | cg03730533 | 7  | 16/21 | 76.19% |
| SLC16A12 | Onco | cg03616221 | 10 | 11/21 | 52.38% |
| SLC2A9   | Onco | cg25117600 | 4  | 13/21 | 61.90% |
| SPTBN4   | Onco | cg07063351 | 19 | 9/21  | 42.86% |
| SPTBN4   | Onco | cg08871964 | 19 | 7/21  | 33.33% |
| SRCIN1   | Onco | cg15809959 | 17 | 8/21  | 38.10% |
| TCTEX1D1 | Onco | cg09769134 | 1  | 7/21  | 33.33% |
| TCTEX1D4 | Onco | cg03434029 | 1  | 8/21  | 38.10% |
| TCTEX1D4 | Onco | cg11448683 | 1  | 8/21  | 38.10% |
| TFAP2A   | Onco | cg00689580 | 6  | 12/21 | 57.14% |
| TFAP2A   | Onco | cg10129408 | 6  | 13/21 | 61.90% |
| THBS4    | Onco | cg19025234 | 5  | 10/21 | 47.62% |
| TMEM101  | Onco | cg16182148 | 17 | 7/21  | 33.33% |
| TMEM37   | Onco | cg09715353 | 2  | 7/21  | 33.33% |
| TRIM10   | Onco | cg16912957 | 6  | 10/21 | 47.62% |
| TRIM10   | Onco | cg18420781 | 6  | 7/21  | 33.33% |
| TRPC4AP  | Onco | cg01154966 | 20 | 7/21  | 33.33% |
| VAT1L    | Onco | cg04591018 | 16 | 9/21  | 42.86% |
| VPS37B   | Onco | cg16953816 | 12 | 17/21 | 80.95% |
| WFDC10A  | Onco | cg15107861 | 20 | 7/21  | 33.33% |
| ZBED3    | Onco | cg03163459 | 5  | 10/21 | 47.62% |
| ZC3H12D  | Onco | cg09313931 | 6  | 8/21  | 38.10% |
| ZC3H12D  | Onco | cg15559674 | 6  | 9/21  | 42.86% |
| ZIC4     | Onco | cg23189410 | 3  | 7/21  | 33.33% |

Suppl Table 3: TCGA tumor identification numbers

| <b>Sample</b> | <b>TCGA reference</b>        | <b>Sample</b> | <b>TCGA reference</b>        |
|---------------|------------------------------|---------------|------------------------------|
| Pap1          | TCGA-A4-7286-01A-11D-2137-05 | Pap42         | TCGA-BQ-7051-01A-12D-1963-05 |
| Pap2          | TCGA-A4-7287-01A-11D-2137-05 | Pap43         | TCGA-BQ-7053-01A-11D-1963-05 |
| Pap3          | TCGA-A4-7288-01A-11D-2137-05 | Pap44         | TCGA-BQ-7055-01A-11D-1963-05 |
| Pap4          | TCGA-A4-7583-01A-11D-2137-05 | Pap45         | TCGA-BQ-7056-01A-11D-1963-05 |
| Pap5          | TCGA-A4-7584-01A-11D-2137-05 | Pap46         | TCGA-BQ-7058-01A-11D-1963-05 |
| Pap6          | TCGA-A4-7585-01A-11D-2137-05 | Pap47         | TCGA-BQ-7059-01A-11D-1963-05 |
| Pap7          | TCGA-A4-7732-01A-11D-2137-05 | Pap48         | TCGA-BQ-7060-01A-11D-1963-05 |
| Pap8          | TCGA-A4-7734-01A-11D-2137-05 | Pap49         | TCGA-BQ-7061-01A-11D-1963-05 |
| Pap9          | TCGA-A4-7828-01A-11D-2137-05 | Pap50         | TCGA-BQ-7062-01A-11D-1963-05 |
| Pap10         | TCGA-AL-7173-01A-11D-2137-05 | Pap51         | TCGA-DW-5560-01A-01D-1590-05 |
| Pap11         | TCGA-B1-5398-01A-02D-1590-05 | Pap52         | TCGA-DW-5561-01A-01D-1590-05 |
| Pap12         | TCGA-B1-7332-01A-11D-2137-05 | Pap53         | TCGA-DW-7834-01A-11D-2137-05 |
| Pap13         | TCGA-B9-5155-01A-01D-1590-05 | Pap54         | TCGA-DW-7836-01A-11D-2137-05 |
| Pap14         | TCGA-B9-5156-01A-01D-1590-05 | Pap55         | TCGA-DW-7837-01A-11D-2137-05 |
| Pap15         | TCGA-B9-7268-01A-11D-2137-05 | Pap56         | TCGA-DW-7838-01A-11D-2137-05 |
| Pap16         | TCGA-BQ-5875-01A-11D-1590-05 | Pap57         | TCGA-DW-7839-01A-11D-2137-05 |
| Pap17         | TCGA-BQ-5876-01A-11D-1590-05 | Pap58         | TCGA-DW-7840-01A-11D-2137-05 |
| Pap18         | TCGA-BQ-5877-01A-11D-1590-05 | Pap59         | TCGA-DW-7841-01A-11D-2137-05 |
| Pap19         | TCGA-BQ-5878-01A-11D-1590-05 | Pap60         | TCGA-DW-7842-01A-11D-2137-05 |
| Pap20         | TCGA-BQ-5879-01A-11D-1590-05 | Pap61         | TCGA-DZ-6131-01A-11D-1963-05 |
| Pap21         | TCGA-BQ-5880-01A-11D-1590-05 | Pap62         | TCGA-DZ-6132-01A-11D-1963-05 |
| Pap22         | TCGA-BQ-5881-01A-11D-1590-05 | Pap63         | TCGA-DZ-6133-01A-11D-1963-05 |
| Pap23         | TCGA-BQ-5882-01A-11D-1590-05 | Pap64         | TCGA-DZ-6134-01A-11D-1963-05 |
| Pap24         | TCGA-BQ-5883-01A-11D-1590-05 | Pap65         | TCGA-DZ-6135-01A-11D-1963-05 |
| Pap25         | TCGA-BQ-5884-01A-11D-1590-05 | Pap66         | TCGA-EV-5901-01A-11D-1590-05 |
| Pap26         | TCGA-BQ-5885-01A-11D-1590-05 | Pap67         | TCGA-EV-5902-01A-11D-1590-05 |
| Pap27         | TCGA-BQ-5886-01A-11D-1590-05 | Pap68         | TCGA-EV-5903-01A-11D-1590-05 |
| Pap28         | TCGA-BQ-5887-01A-11D-1963-05 | Pap69         | TCGA-G7-6789-01A-11D-1963-05 |
| Pap29         | TCGA-BQ-5888-01A-11D-1590-05 | Pap70         | TCGA-G7-6790-01A-11D-1963-05 |
| Pap30         | TCGA-BQ-5889-01A-11D-1590-05 | Pap71         | TCGA-G7-6792-01A-21D-1963-05 |
| Pap31         | TCGA-BQ-5890-01A-11D-1590-05 | Pap72         | TCGA-G7-6793-01A-11D-1963-05 |
| Pap32         | TCGA-BQ-5891-01A-11D-1590-05 | Pap73         | TCGA-G7-6795-01A-11D-1963-05 |
| Pap33         | TCGA-BQ-5892-01A-11D-1590-05 | Pap74         | TCGA-G7-6796-01A-11D-1963-05 |
| Pap34         | TCGA-BQ-5893-01A-11D-1590-05 | Pap75         | TCGA-G7-6797-01A-11D-1963-05 |
| Pap35         | TCGA-BQ-5894-01A-11D-1590-05 | Pap76         | TCGA-GL-6846-01A-11D-1963-05 |
| Pap36         | TCGA-BQ-7044-01A-11D-1963-05 | Pap77         | TCGA-GL-7773-01A-11D-2137-05 |
| Pap37         | TCGA-BQ-7045-01A-31D-1963-05 | Pap78         | TCGA-HE-7128-01A-11D-1963-05 |
| Pap38         | TCGA-BQ-7046-01A-11D-1963-05 | Pap79         | TCGA-HE-7129-01A-11D-1963-05 |
| Pap39         | TCGA-BQ-7048-01A-11D-1963-05 | Pap80         | TCGA-HE-7130-01A-11D-1963-05 |
| Pap40         | TCGA-BQ-7049-01A-11D-1963-05 | Pap81         | TCGA-J7-6720-01A-11D-2137-05 |
| Pap41         | TCGA-BQ-7050-01A-11D-1963-05 |               |                              |

| <b>Sample</b> | <b>TCGA reference</b>        | <b>Sample</b> | <b>TCGA reference</b>        |
|---------------|------------------------------|---------------|------------------------------|
| ccRCC1        | TCGA-A3-3358-01A-01D-1536-05 | ccRCC51       | TCGA-BP-4795-01A-02D-1418-05 |
| ccRCC2        | TCGA-A3-3367-01A-02D-1418-05 | ccRCC52       | TCGA-BP-4801-01A-02D-1418-05 |
| ccRCC3        | TCGA-A3-3373-01A-02D-1418-05 | ccRCC53       | TCGA-BP-5168-01A-01D-1418-05 |
| ccRCC4        | TCGA-A3-3385-01A-02D-1418-05 | ccRCC54       | TCGA-BP-5169-01A-01D-1424-05 |
| ccRCC5        | TCGA-A3-3387-01A-01D-1536-05 | ccRCC55       | TCGA-BP-5170-01A-01D-1424-05 |
| ccRCC6        | TCGA-AK-3428-01A-02D-1275-05 | ccRCC56       | TCGA-BP-5182-01A-01D-1424-05 |
| ccRCC7        | TCGA-AK-3434-01A-02D-1275-05 | ccRCC57       | TCGA-BP-5183-01A-01D-1424-05 |
| ccRCC8        | TCGA-AK-3445-01A-02D-1275-05 | ccRCC58       | TCGA-BP-5187-01A-01D-1424-05 |
| ccRCC9        | TCGA-B0-4693-01A-01D-1275-05 | ccRCC59       | TCGA-BP-5190-01A-01D-1424-05 |
| ccRCC10       | TCGA-B0-4698-01A-01D-1500-05 | ccRCC60       | TCGA-BP-5191-01A-01D-1424-05 |
| ccRCC11       | TCGA-B0-4701-01A-01D-1275-05 | ccRCC61       | TCGA-BP-5192-01A-01D-1424-05 |
| ccRCC12       | TCGA-B0-4707-01A-01D-1275-05 | ccRCC62       | TCGA-BP-5194-01A-02D-1424-05 |
| ccRCC13       | TCGA-B0-4710-01A-01D-1500-05 | ccRCC63       | TCGA-BP-5196-01A-01D-1424-05 |
| ccRCC14       | TCGA-B0-4821-01A-01D-1500-05 | ccRCC64       | TCGA-BP-5200-01A-01D-1424-05 |
| ccRCC15       | TCGA-B0-4827-01A-02D-1418-05 | ccRCC65       | TCGA-BP-5202-01A-02D-1424-05 |
| ccRCC16       | TCGA-B0-4841-01A-01D-1275-05 | ccRCC66       | TCGA-CJ-4897-01A-03D-1424-05 |
| ccRCC17       | TCGA-B0-4842-01A-02D-1418-05 | ccRCC67       | TCGA-CJ-5681-01A-11D-1536-05 |
| ccRCC18       | TCGA-B0-4845-01A-01D-1275-05 | ccRCC68       | TCGA-CJ-5682-01A-11D-1536-05 |
| ccRCC19       | TCGA-B0-4847-01A-01D-1275-05 | ccRCC69       | TCGA-CJ-5683-01A-11D-1536-05 |
| ccRCC20       | TCGA-B0-4848-01A-01D-1275-05 | ccRCC70       | TCGA-CJ-5684-01A-11D-1536-05 |
| ccRCC21       | TCGA-B0-4849-01A-01D-1275-05 | ccRCC71       | TCGA-CJ-5686-01A-11D-1670-05 |
| ccRCC22       | TCGA-B0-5080-01A-01D-1500-05 | ccRCC72       | TCGA-CJ-6027-01A-11D-1670-05 |
| ccRCC23       | TCGA-B0-5097-01A-01D-1418-05 | ccRCC73       | TCGA-CJ-6028-01A-11D-1670-05 |
| ccRCC24       | TCGA-B0-5099-01A-01D-1418-05 | ccRCC74       | TCGA-CW-5580-01A-01D-1670-05 |
| ccRCC25       | TCGA-B0-5107-01A-01D-1418-05 | ccRCC75       | TCGA-CW-5588-01A-01D-1536-05 |
| ccRCC26       | TCGA-B0-5110-01A-01D-1418-05 | ccRCC76       | TCGA-CW-5590-01A-01D-1536-05 |
| ccRCC27       | TCGA-B0-5113-01A-01D-1418-05 | ccRCC77       | TCGA-CW-6090-01A-11D-1670-05 |
| ccRCC28       | TCGA-B0-5116-01A-02D-1418-05 | ccRCC78       | TCGA-CW-6097-01A-11D-1670-05 |
| ccRCC29       | TCGA-B0-5119-01A-02D-1418-05 | ccRCC79       | TCGA-CZ-4853-01A-01D-1424-05 |
| ccRCC30       | TCGA-B0-5120-01A-01D-1418-05 | ccRCC80       | TCGA-CZ-4856-01A-02D-1424-05 |
| ccRCC31       | TCGA-B0-5121-01A-02D-1418-05 | ccRCC81       | TCGA-CZ-4859-01A-02D-1424-05 |
| ccRCC32       | TCGA-B0-5399-01A-01D-1500-05 | ccRCC82       | TCGA-CZ-4863-01A-01D-1500-05 |
| ccRCC33       | TCGA-B0-5690-01A-11D-1536-05 | ccRCC83       | TCGA-CZ-4865-01A-02D-1500-05 |
| ccRCC34       | TCGA-B0-5692-01A-11D-1536-05 | ccRCC84       | TCGA-CZ-4866-01A-01D-1500-05 |
| ccRCC35       | TCGA-B0-5694-01A-11D-1536-05 | ccRCC85       | TCGA-CZ-5451-01A-01D-1500-05 |
| ccRCC36       | TCGA-B0-5697-01A-11D-1536-05 | ccRCC86       | TCGA-CZ-5454-01A-01D-1500-05 |
| ccRCC37       | TCGA-B0-5698-01A-11D-1670-05 | ccRCC87       | TCGA-CZ-5455-01A-01D-1500-05 |
| ccRCC38       | TCGA-B0-5706-01A-11D-1536-05 | ccRCC88       | TCGA-CZ-5457-01A-01D-1500-05 |
| ccRCC39       | TCGA-B0-5712-01A-11D-1670-05 | ccRCC89       | TCGA-CZ-5458-01A-01D-1500-05 |
| ccRCC40       | TCGA-B0-5713-01A-11D-1670-05 | ccRCC90       | TCGA-CZ-5462-01A-01D-1500-05 |
| ccRCC41       | TCGA-B2-5633-01A-01D-1536-05 | ccRCC91       | TCGA-CZ-5465-01A-01D-1500-05 |
| ccRCC42       | TCGA-B2-5639-01A-01D-1536-05 | ccRCC92       | TCGA-CZ-5466-01A-01D-1500-05 |
| ccRCC43       | TCGA-B4-5378-01A-01D-1500-05 | ccRCC93       | TCGA-CZ-5467-01A-01D-1500-05 |
| ccRCC44       | TCGA-B4-5834-01A-11D-1670-05 | ccRCC94       | TCGA-CZ-5469-01A-01D-1500-05 |
| ccRCC45       | TCGA-B4-5836-01A-11D-1670-05 | ccRCC95       | TCGA-DV-5569-01A-01D-1536-05 |



|         |                              |          |                              |
|---------|------------------------------|----------|------------------------------|
| ccRCC46 | TCGA-B4-5843-01A-11D-1670-05 | ccRCC96  | TCGA-DV-5574-01A-01D-1536-05 |
| ccRCC47 | TCGA-B8-4621-01A-01D-1500-05 | ccRCC97  | TCGA-DV-5576-01A-01D-1536-05 |
| ccRCC48 | TCGA-B8-4622-01A-02D-1275-05 | ccRCC98  | TCGA-EU-5905-01A-11D-1670-05 |
| ccRCC49 | TCGA-B8-5162-01A-01D-1418-05 | ccRCC99  | TCGA-EU-5906-01A-11D-1670-05 |
| ccRCC50 | TCGA-B8-5552-01B-11D-1670-05 | ccRCC100 | TCGA-EU-5907-01A-11D-1670-05 |
